# Supplementary material for: Cross-utilisation of template RNAs by alphavirus replicases
Source: PubMed Central journal article supplement (PMC7498090; doi:10.1371/journal.ppat.1008825), 2020-09-04
Supplement: ppat.1008825.s001.pdf [file ppat.1008825.s001.pdf]

S1 Fig

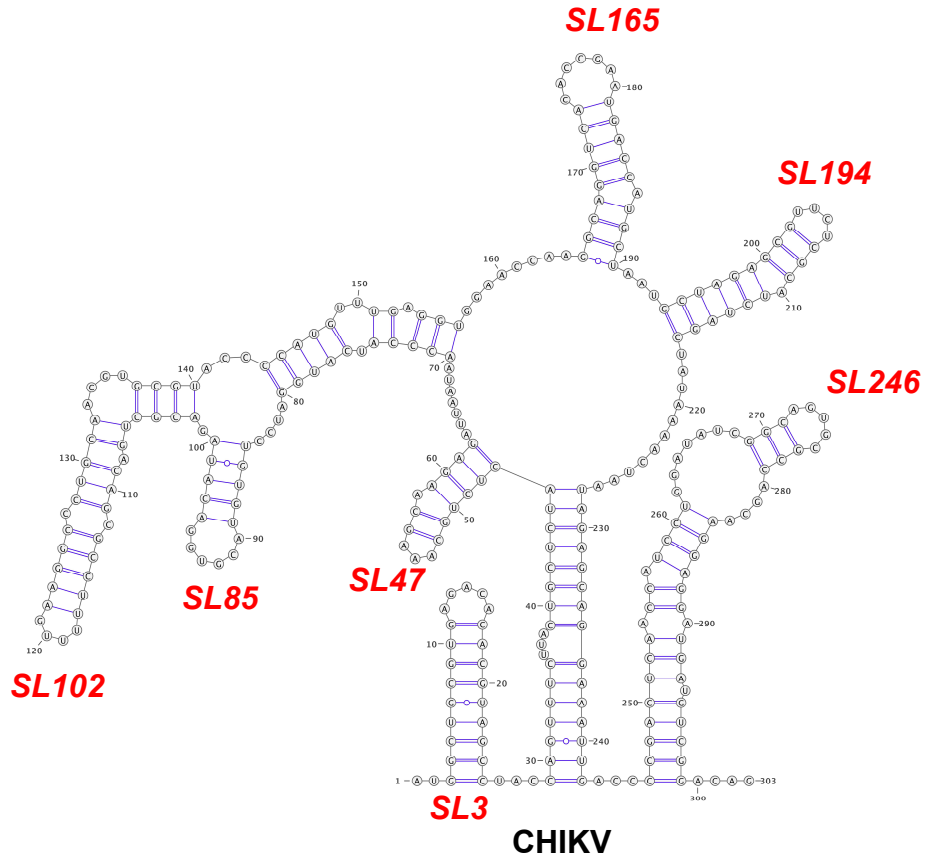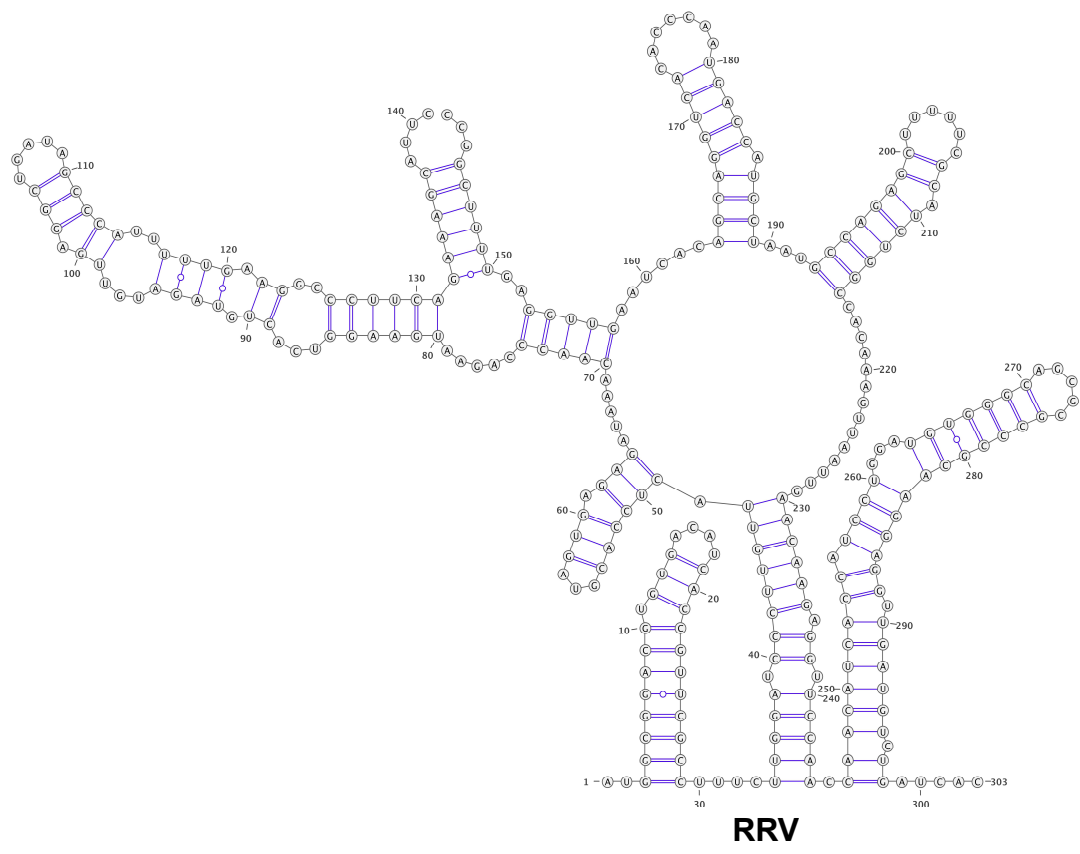

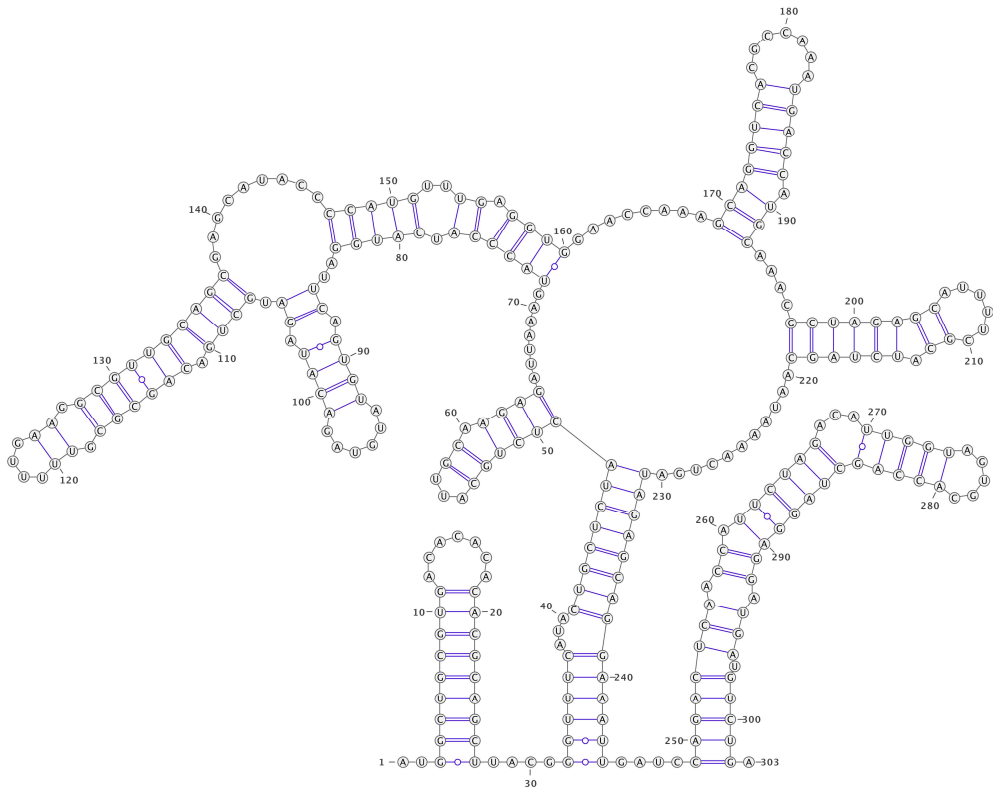

## ONNV

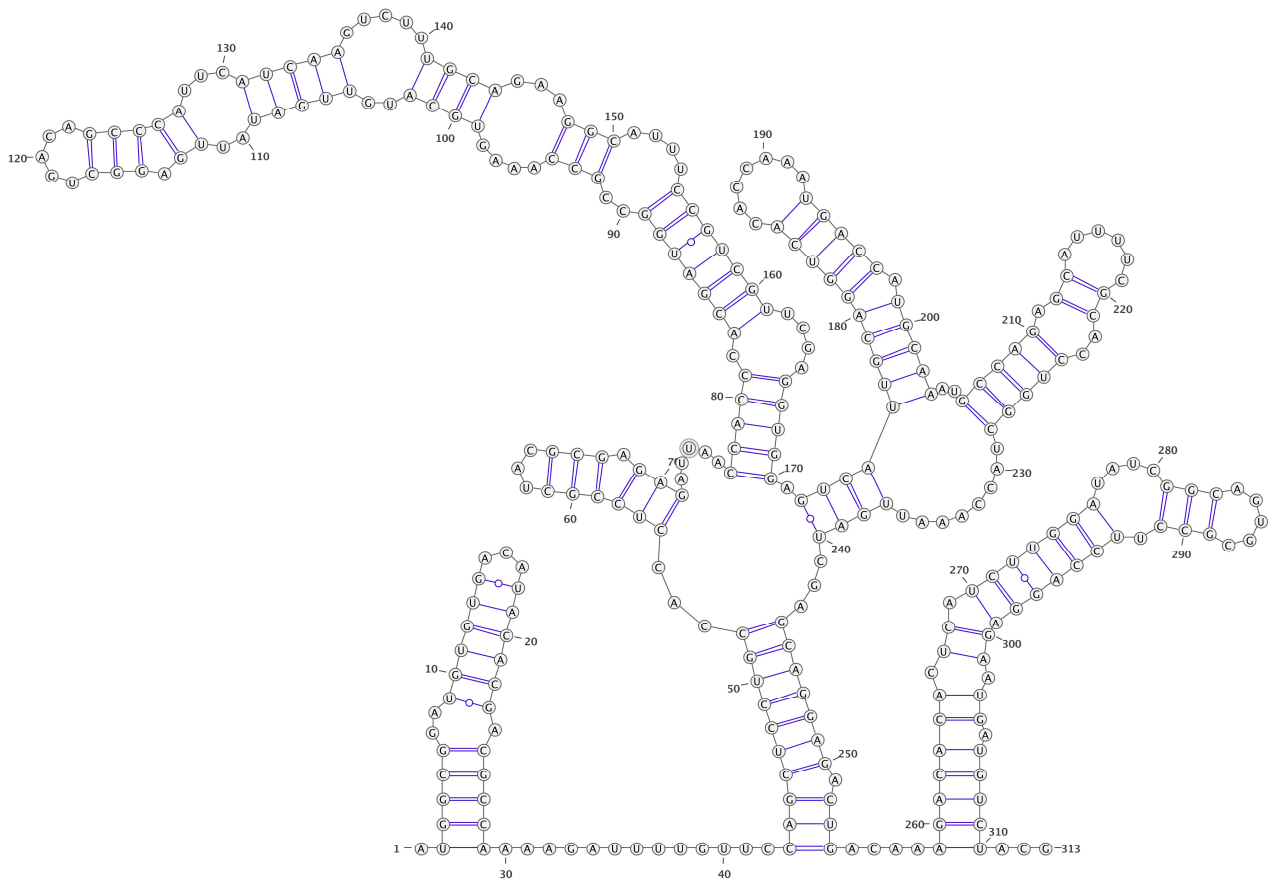

## SFV

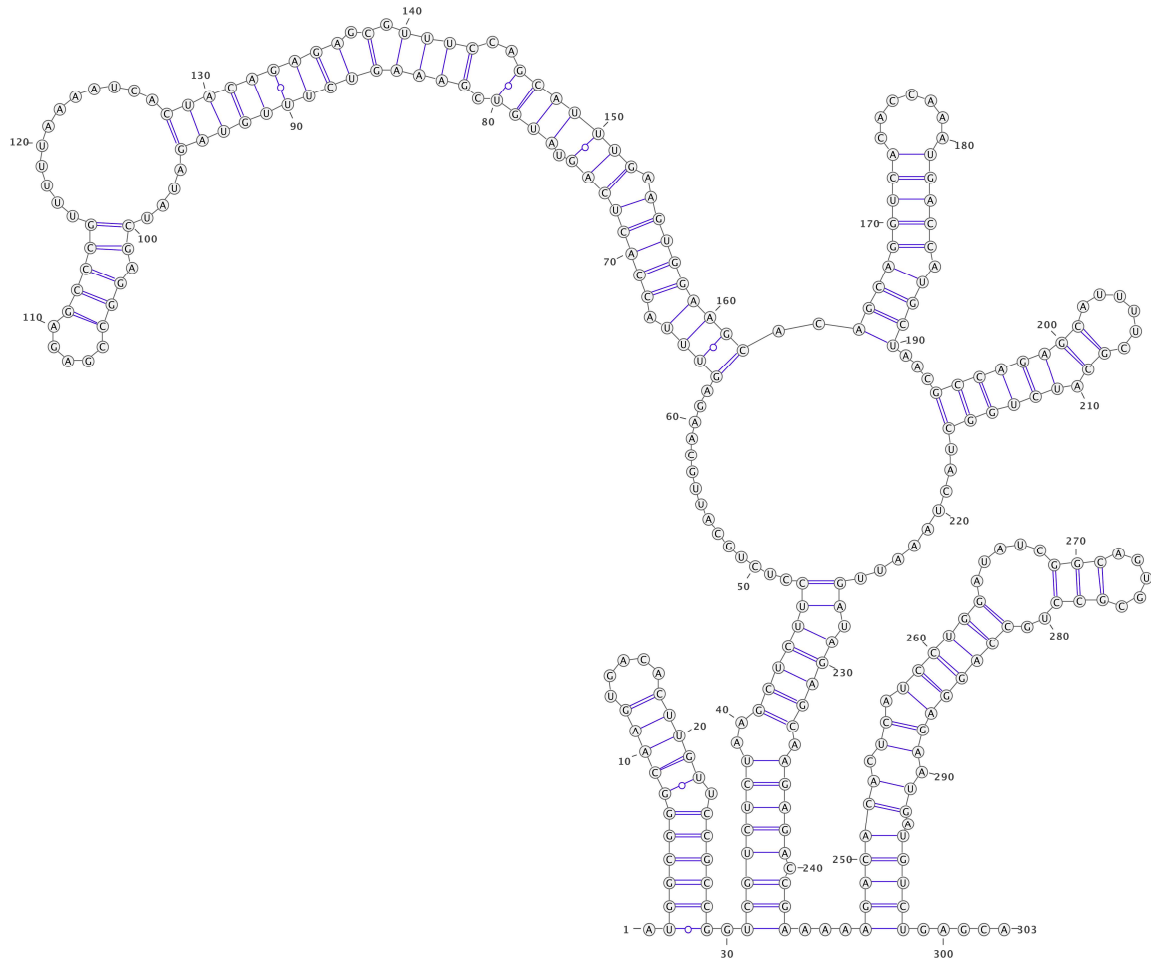

**MAYV**

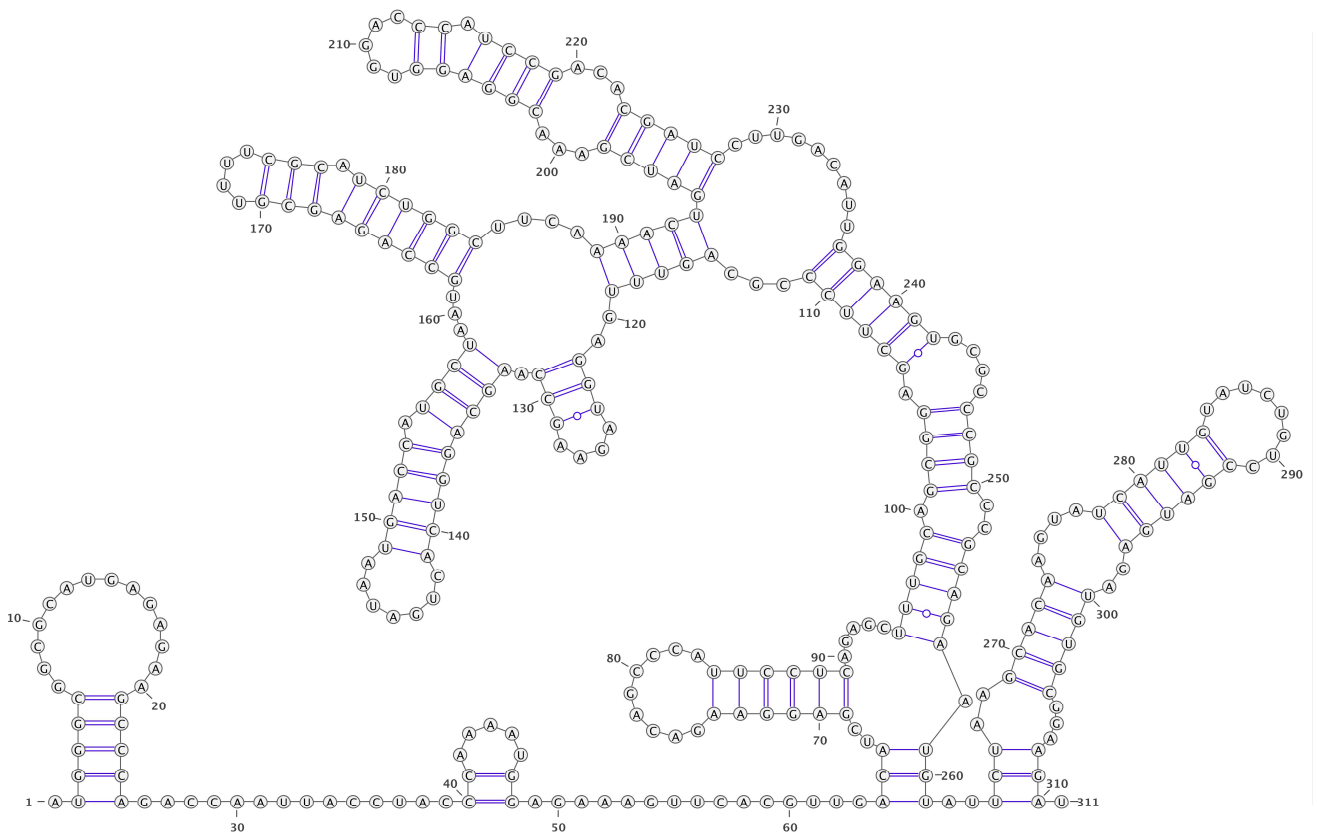

**VEEV**





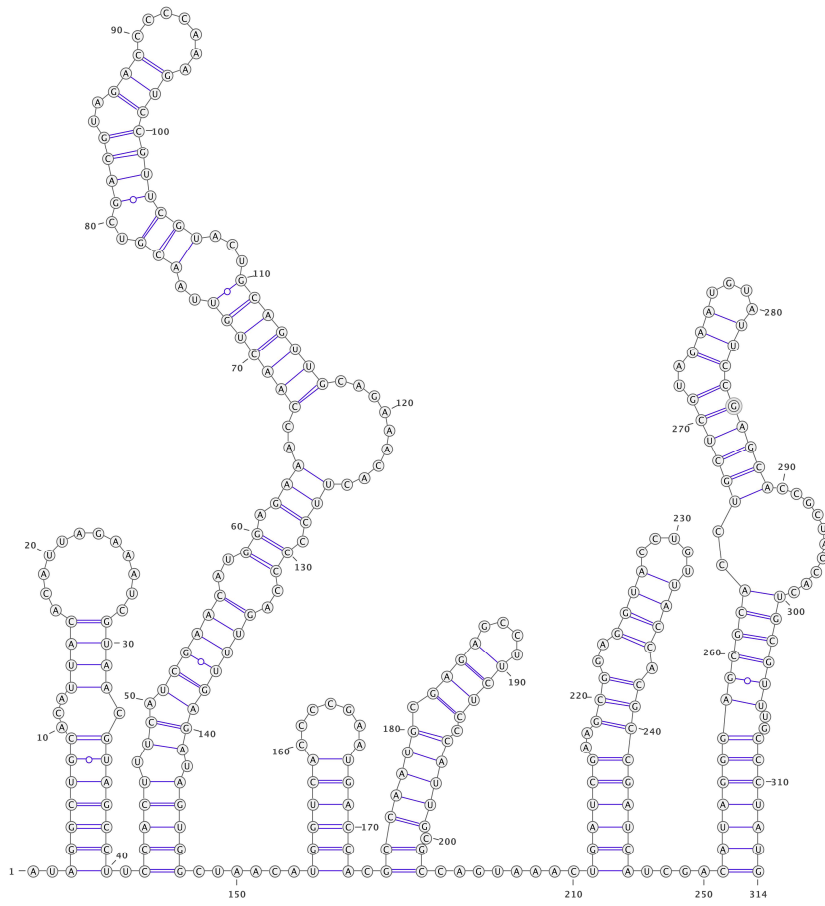

**EILV\_37°C**

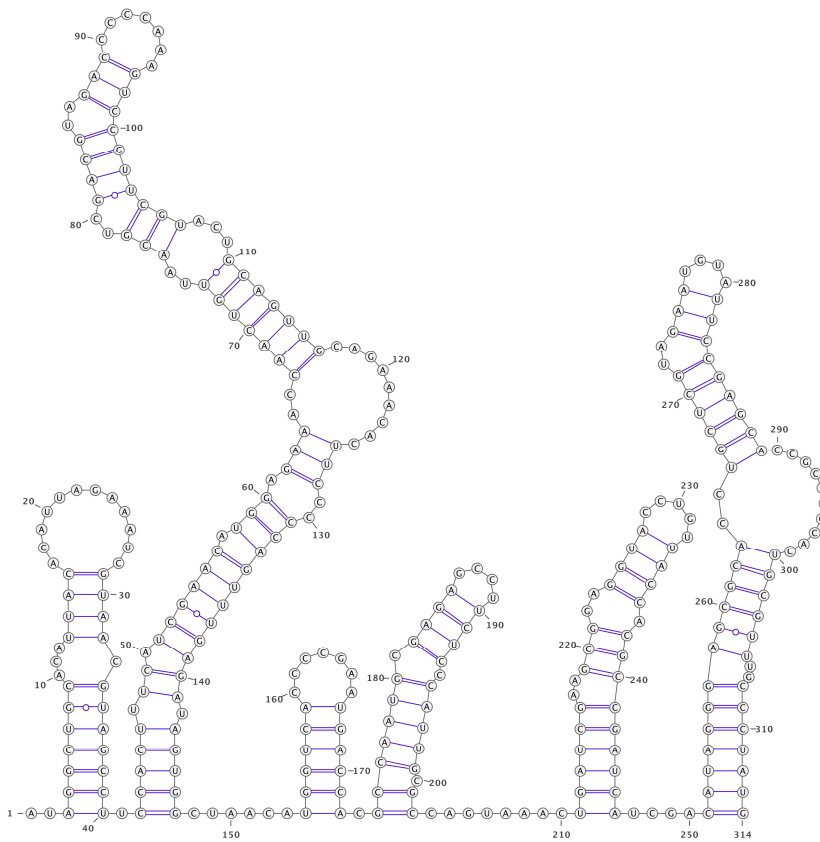

**EILV\_28°C**
